# Supplementary material for: Early-life stress lastingly impacts microglial transcriptome and function under basal and immune-challenged conditions
Source: PubMed Central journal article supplement (PMC9731997; doi:10.1038/s41398-022-02265-6), 2022-12-08

Figure S1

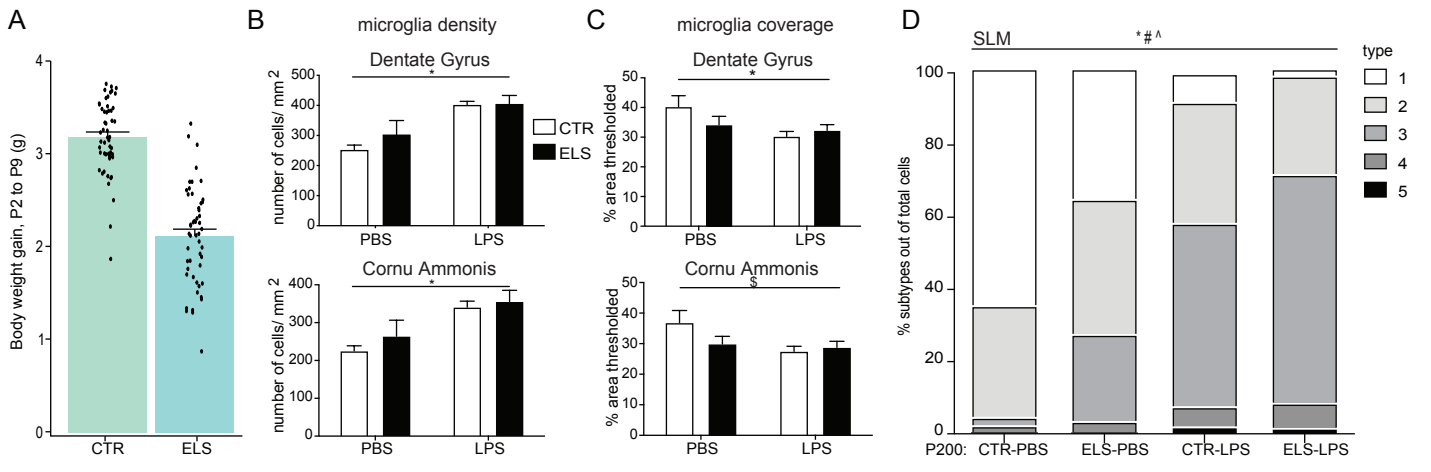

Supplement: 41398_2022_2265_MOESM2_ESM.pdf [file 41398_2022_2265_MOESM2_ESM.pdf]
