# Supplementary material for: Early-life stress lastingly impacts microglial transcriptome and function under basal and immune-challenged conditions
Source: PubMed Central journal article supplement (PMC9731997; doi:10.1038/s41398-022-02265-6), 2022-12-08

Figure S3

A

| Experimental group    | IFN $\gamma$ |                | IL6          |                | IL10         |                | IL12p70      |                | MCP-1        |                | TNF          |                |
|-----------------------|--------------|----------------|--------------|----------------|--------------|----------------|--------------|----------------|--------------|----------------|--------------|----------------|
|                       | Mean         | SD             | Mean         | SD             | Mean         | SD             | Mean         | SD             | Mean         | SD             | Mean         | SD             |
| CTL-PBS (N=7)         | 0.669        | 0.062          | 23.806       | 3.507          | 88.454       | 15.591         | 16.925       | 5.769          | 26.024       | 4.384          | 0.766        | 0.403          |
| ELS-PBS (N=6)         | 0.738        | 0.144          | 49.995       | 40.976         | 88.281       | 12.939         | 31.937       | 32.437         | 39.968       | 17.441         | 0.763        | 0.345          |
| CTL-LPS (N=7)         | 4.295        | 1.533          | 14898.098    | 1432.613       | 569.667      | 234.826        | 41.470       | 11.660         | 5367.950     | 718.695        | 668.056      | 464.294        |
| ELS-LPS (N=5)         | 3.986        | 1.264          | 14837.980    | 1805.400       | 606.816      | 159.516        | 61.950       | 63.274         | 5402.863     | 1398.141       | 651.438      | 570.128        |
| <b>Two-way ANOVA</b>  | <b>F1.21</b> | <b>p-value</b> | <b>F1.21</b> | <b>p-value</b> | <b>F1.21</b> | <b>p-value</b> | <b>F1.21</b> | <b>p-value</b> | <b>F1.21</b> | <b>p-value</b> | <b>F1.21</b> | <b>p-value</b> |
| Condition             | 0.449        | 0.510          | 2.422        | 0.135          | 0.008        | 0.931          | 1.557        | 0.226          | 0.570        | 0.459          | 0.003        | 0.954          |
| Treatment             | 75.949       | <0.0001*       | 1135.063     | <0.0001*       | 74.435       | <0.0001*       | 4.258        | 0.052          | 342.913      | <0.0001*       | 21.318       | 0.0001*        |
| Condition X Treatment | 0.224        | 0.641          | 0.009        | 0.923          | 0.103        | 0.751          | 0.043        | 0.837          | 0.001        | 0.972          | 0.003        | 0.954          |

B

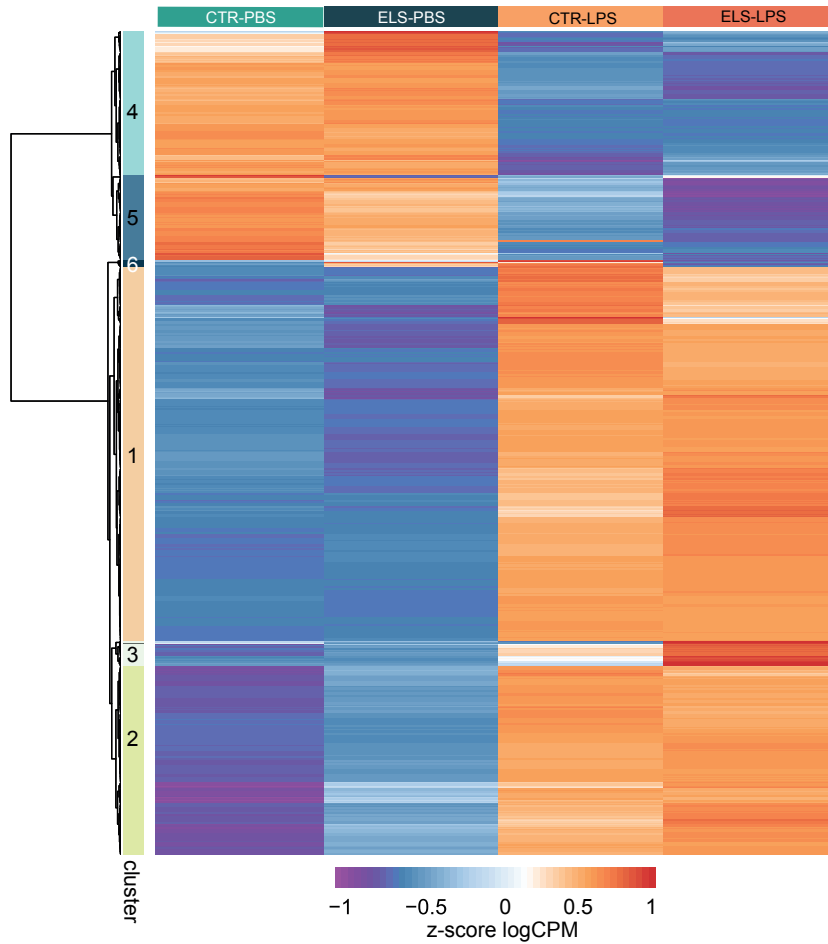

Supplement: 41398_2022_2265_MOESM4_ESM.pdf [file 41398_2022_2265_MOESM4_ESM.pdf]
